# Supplementary material for: Integrating data‐deficient species in analyses of evolutionary history loss
Source: PubMed Central journal article supplement (PMC5167052; doi:10.1002/ece3.2390), 2016-11-01

# Effect of the clustering of data-deficient species

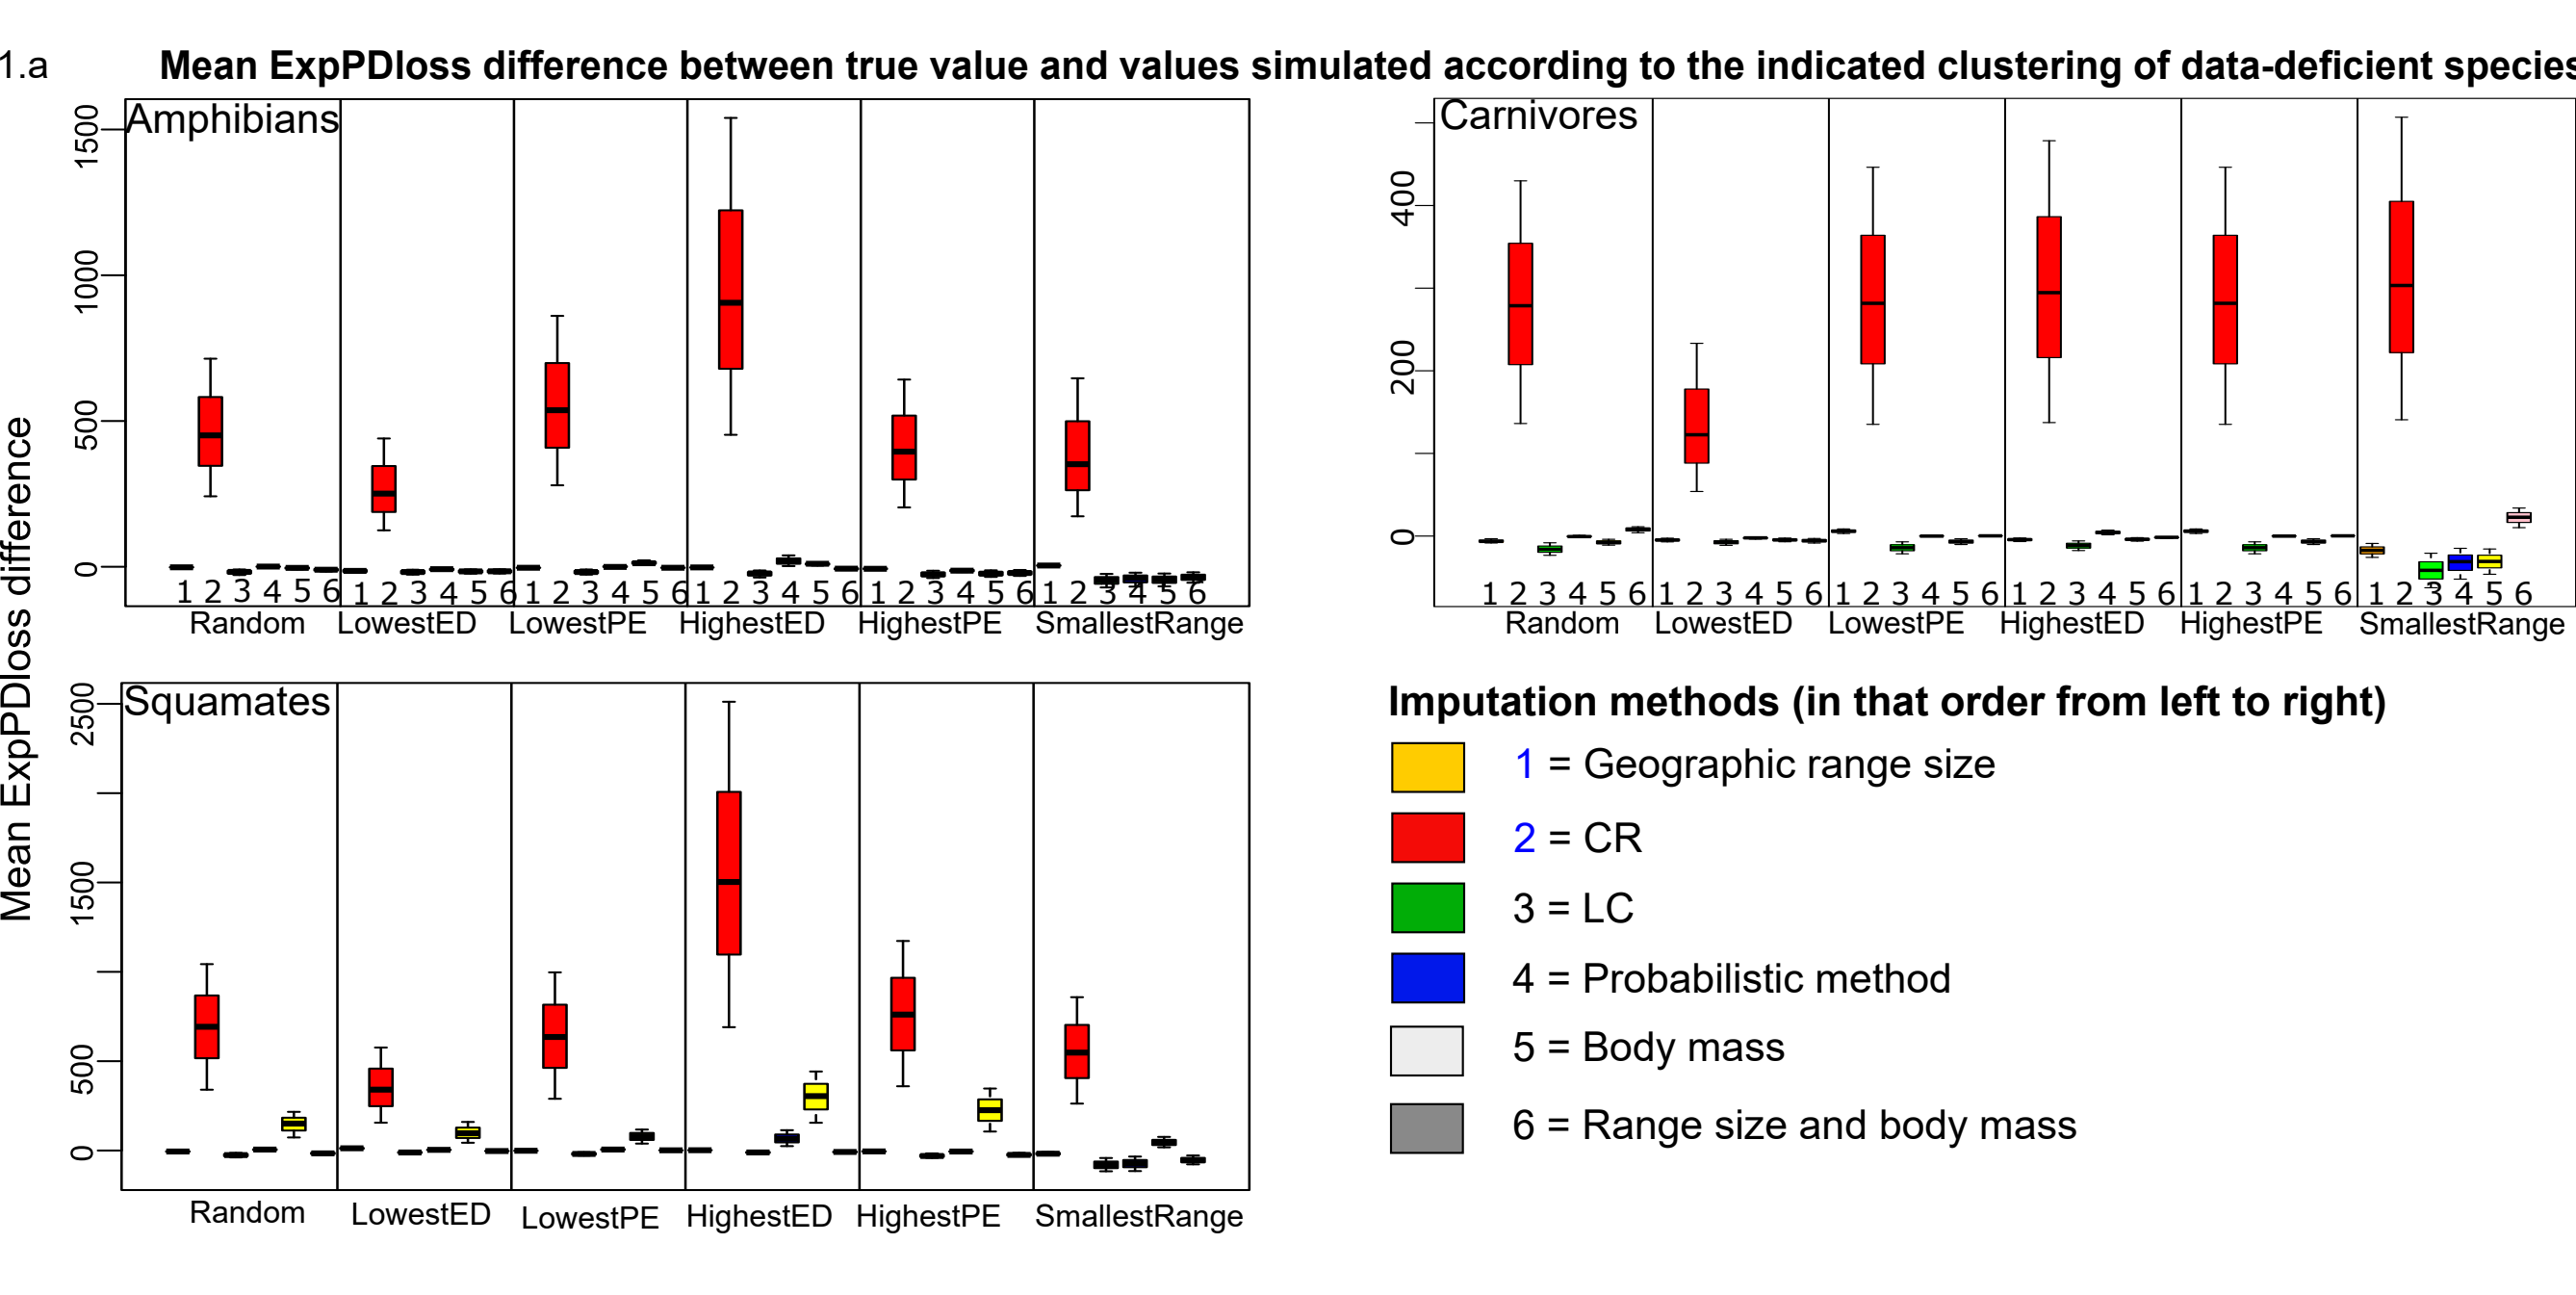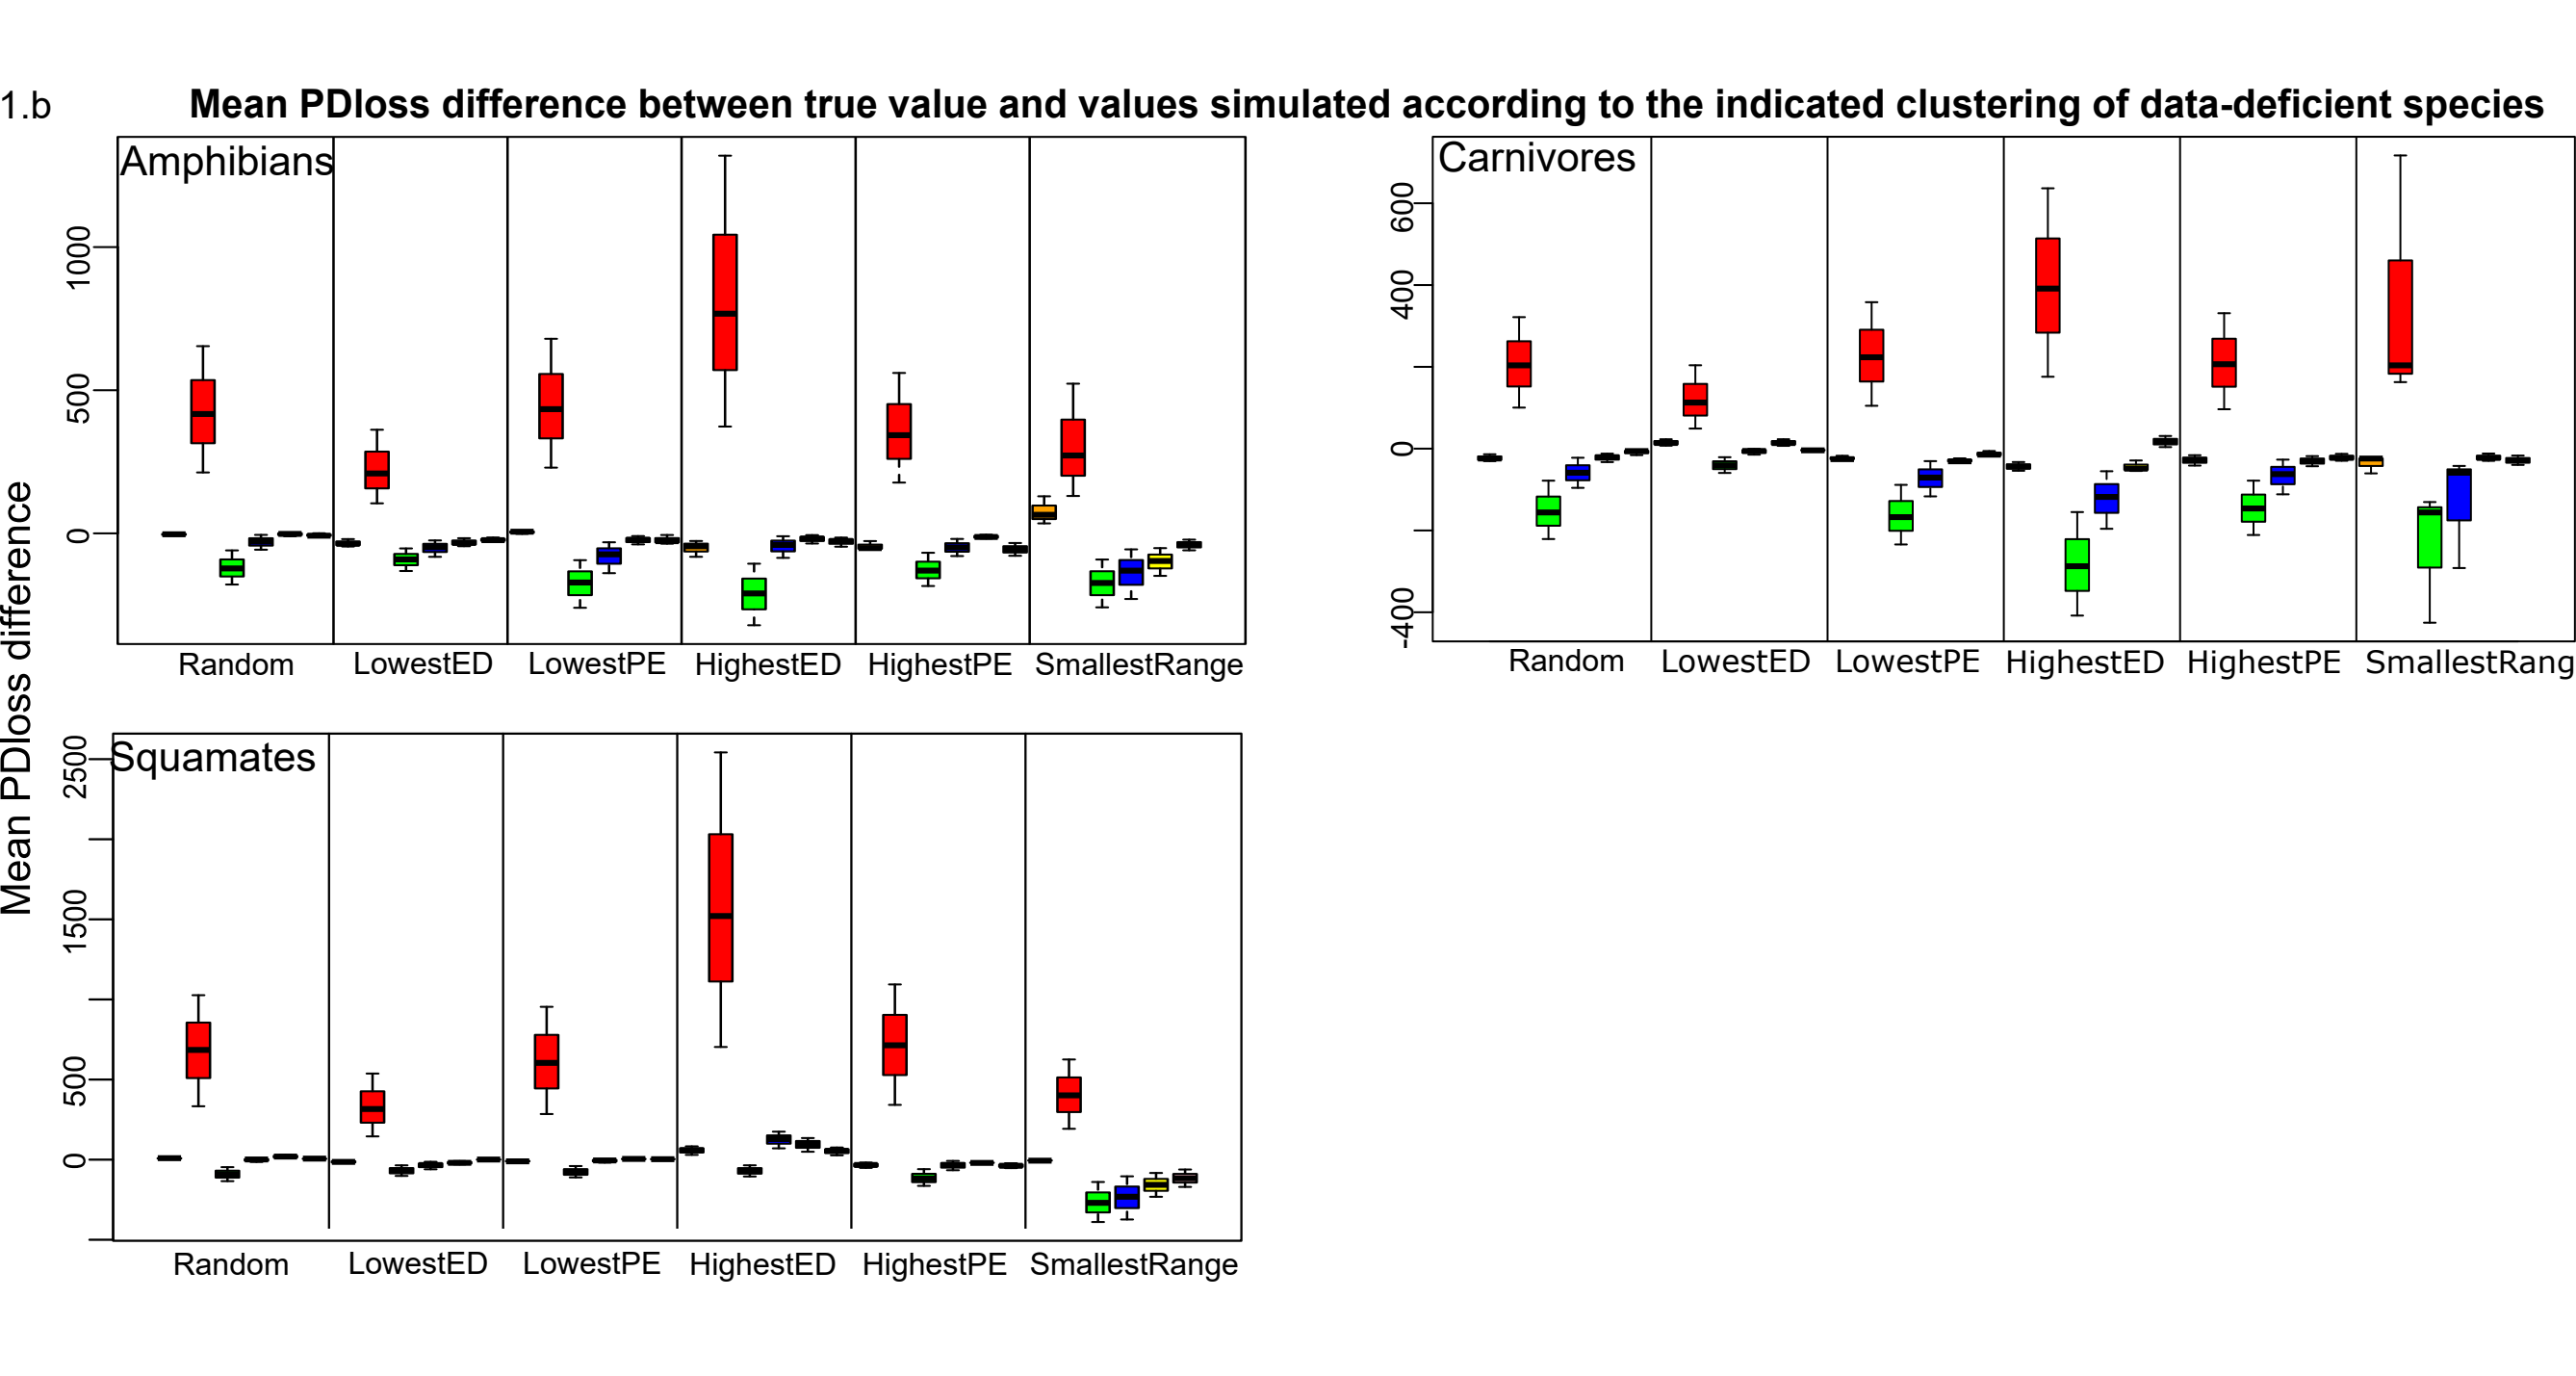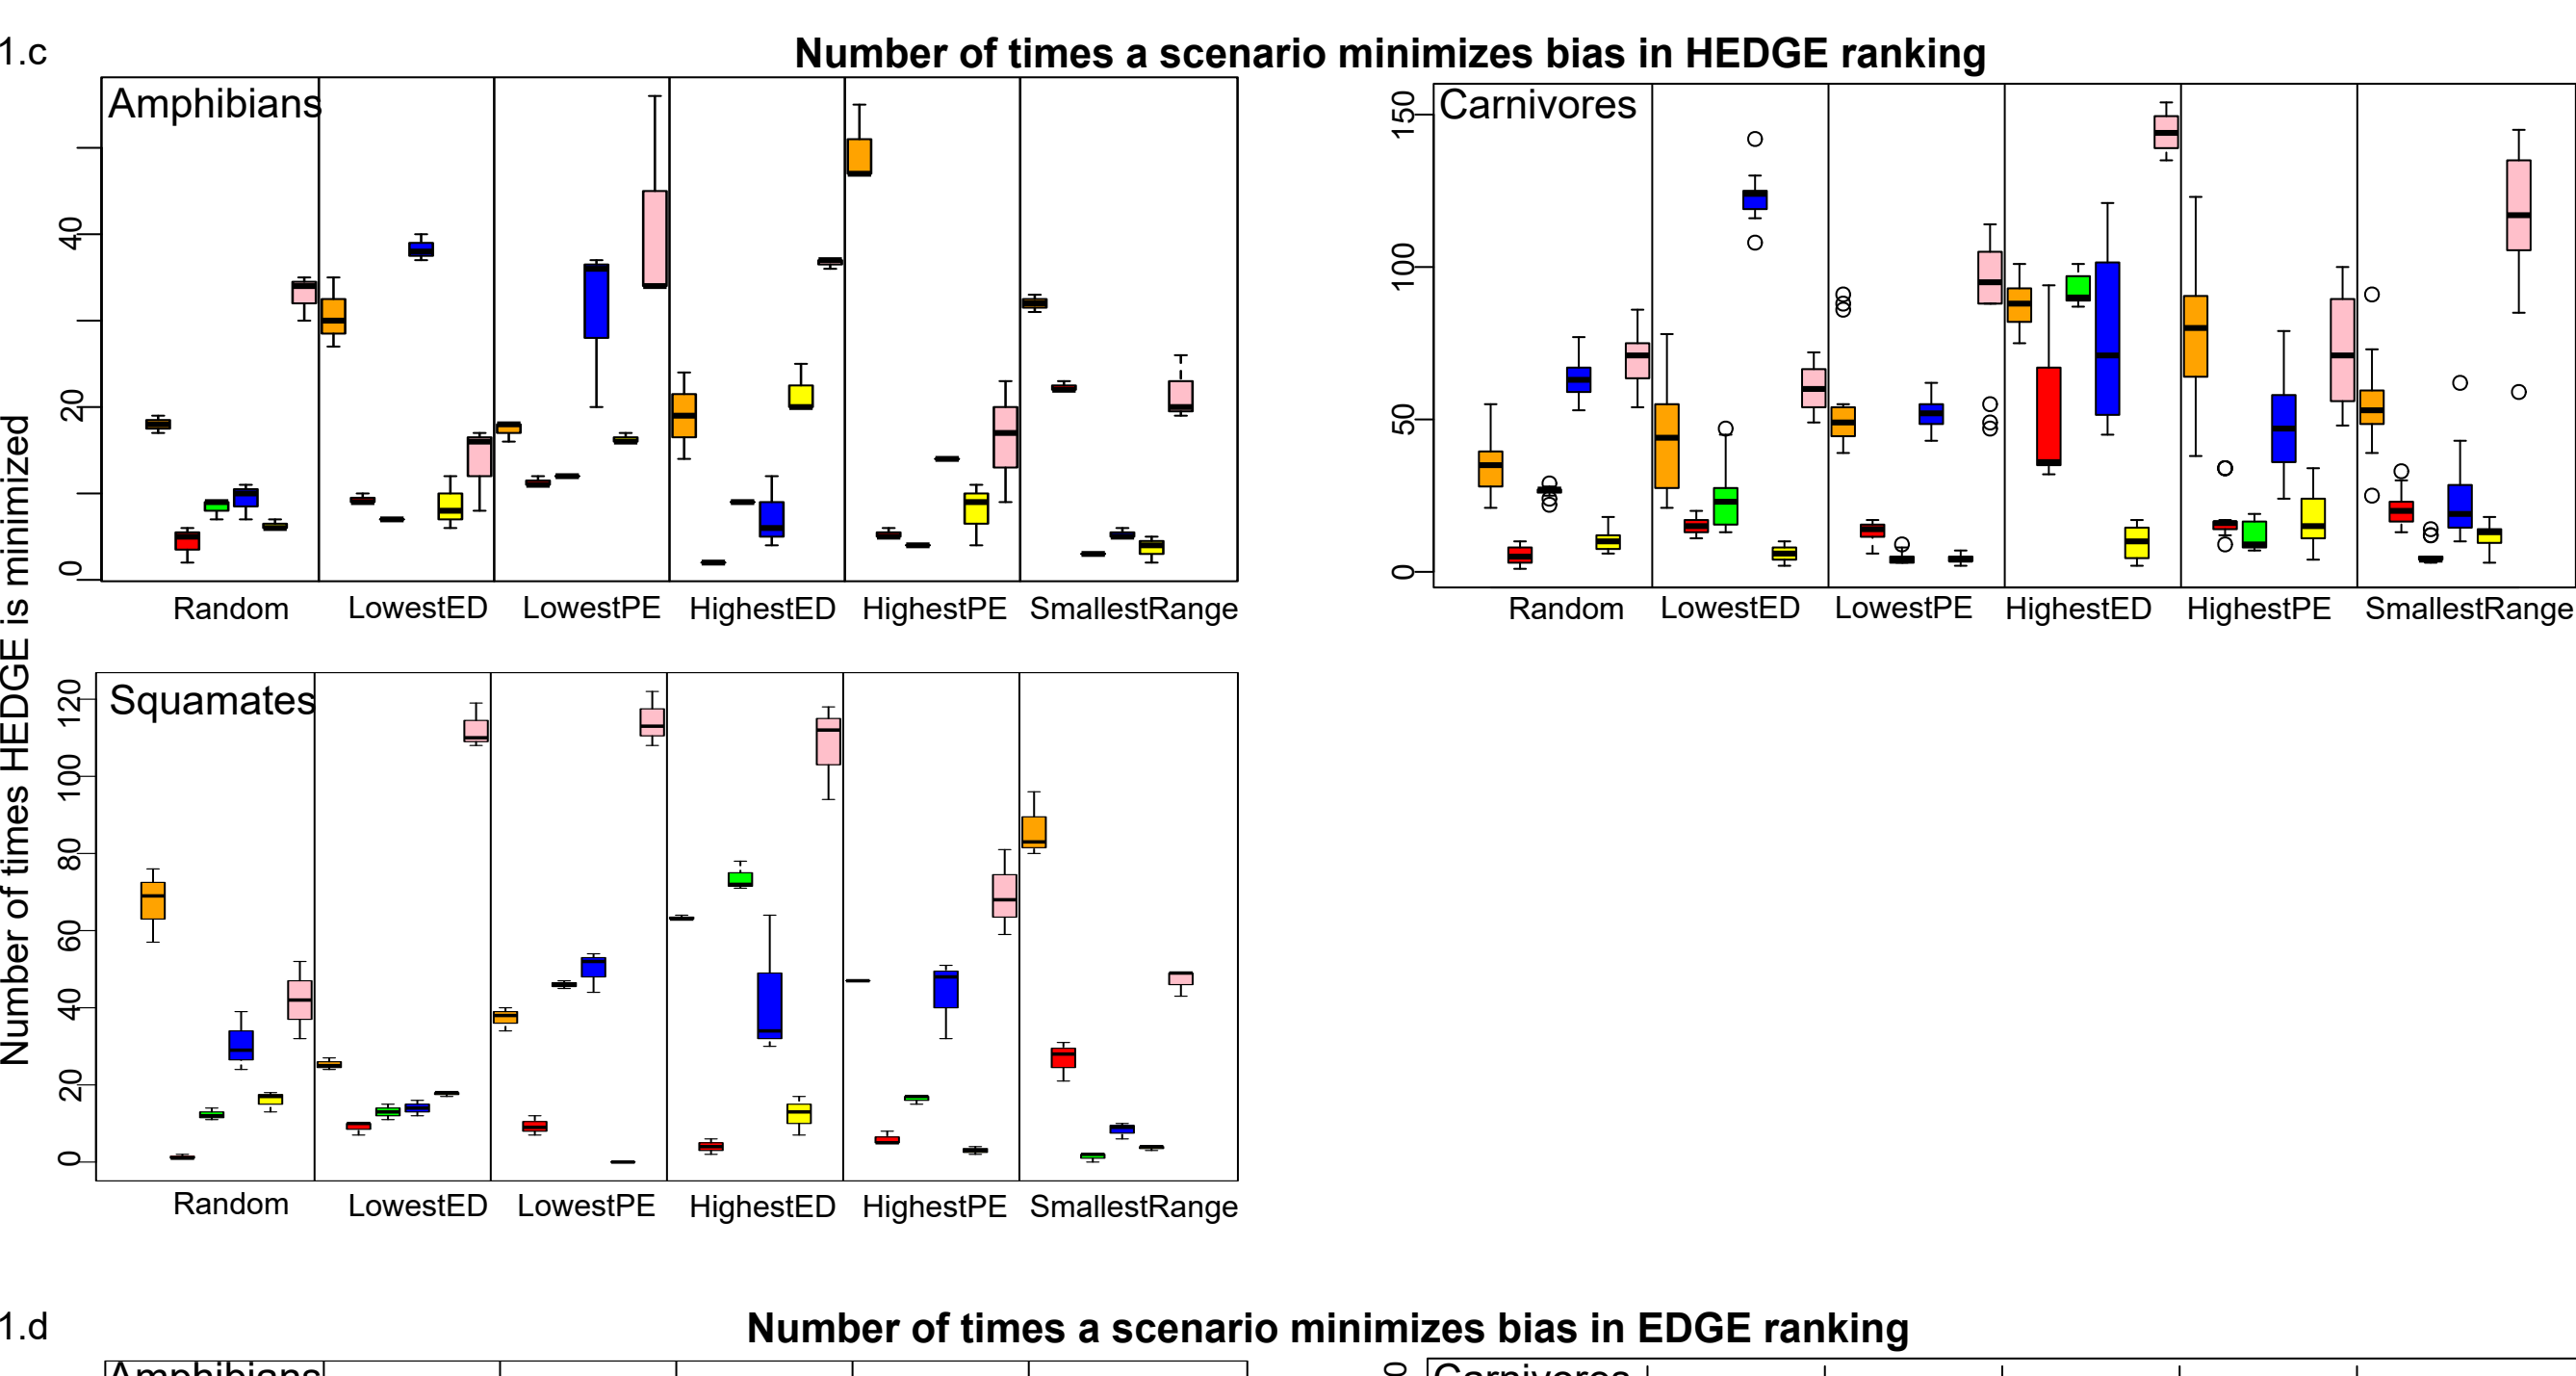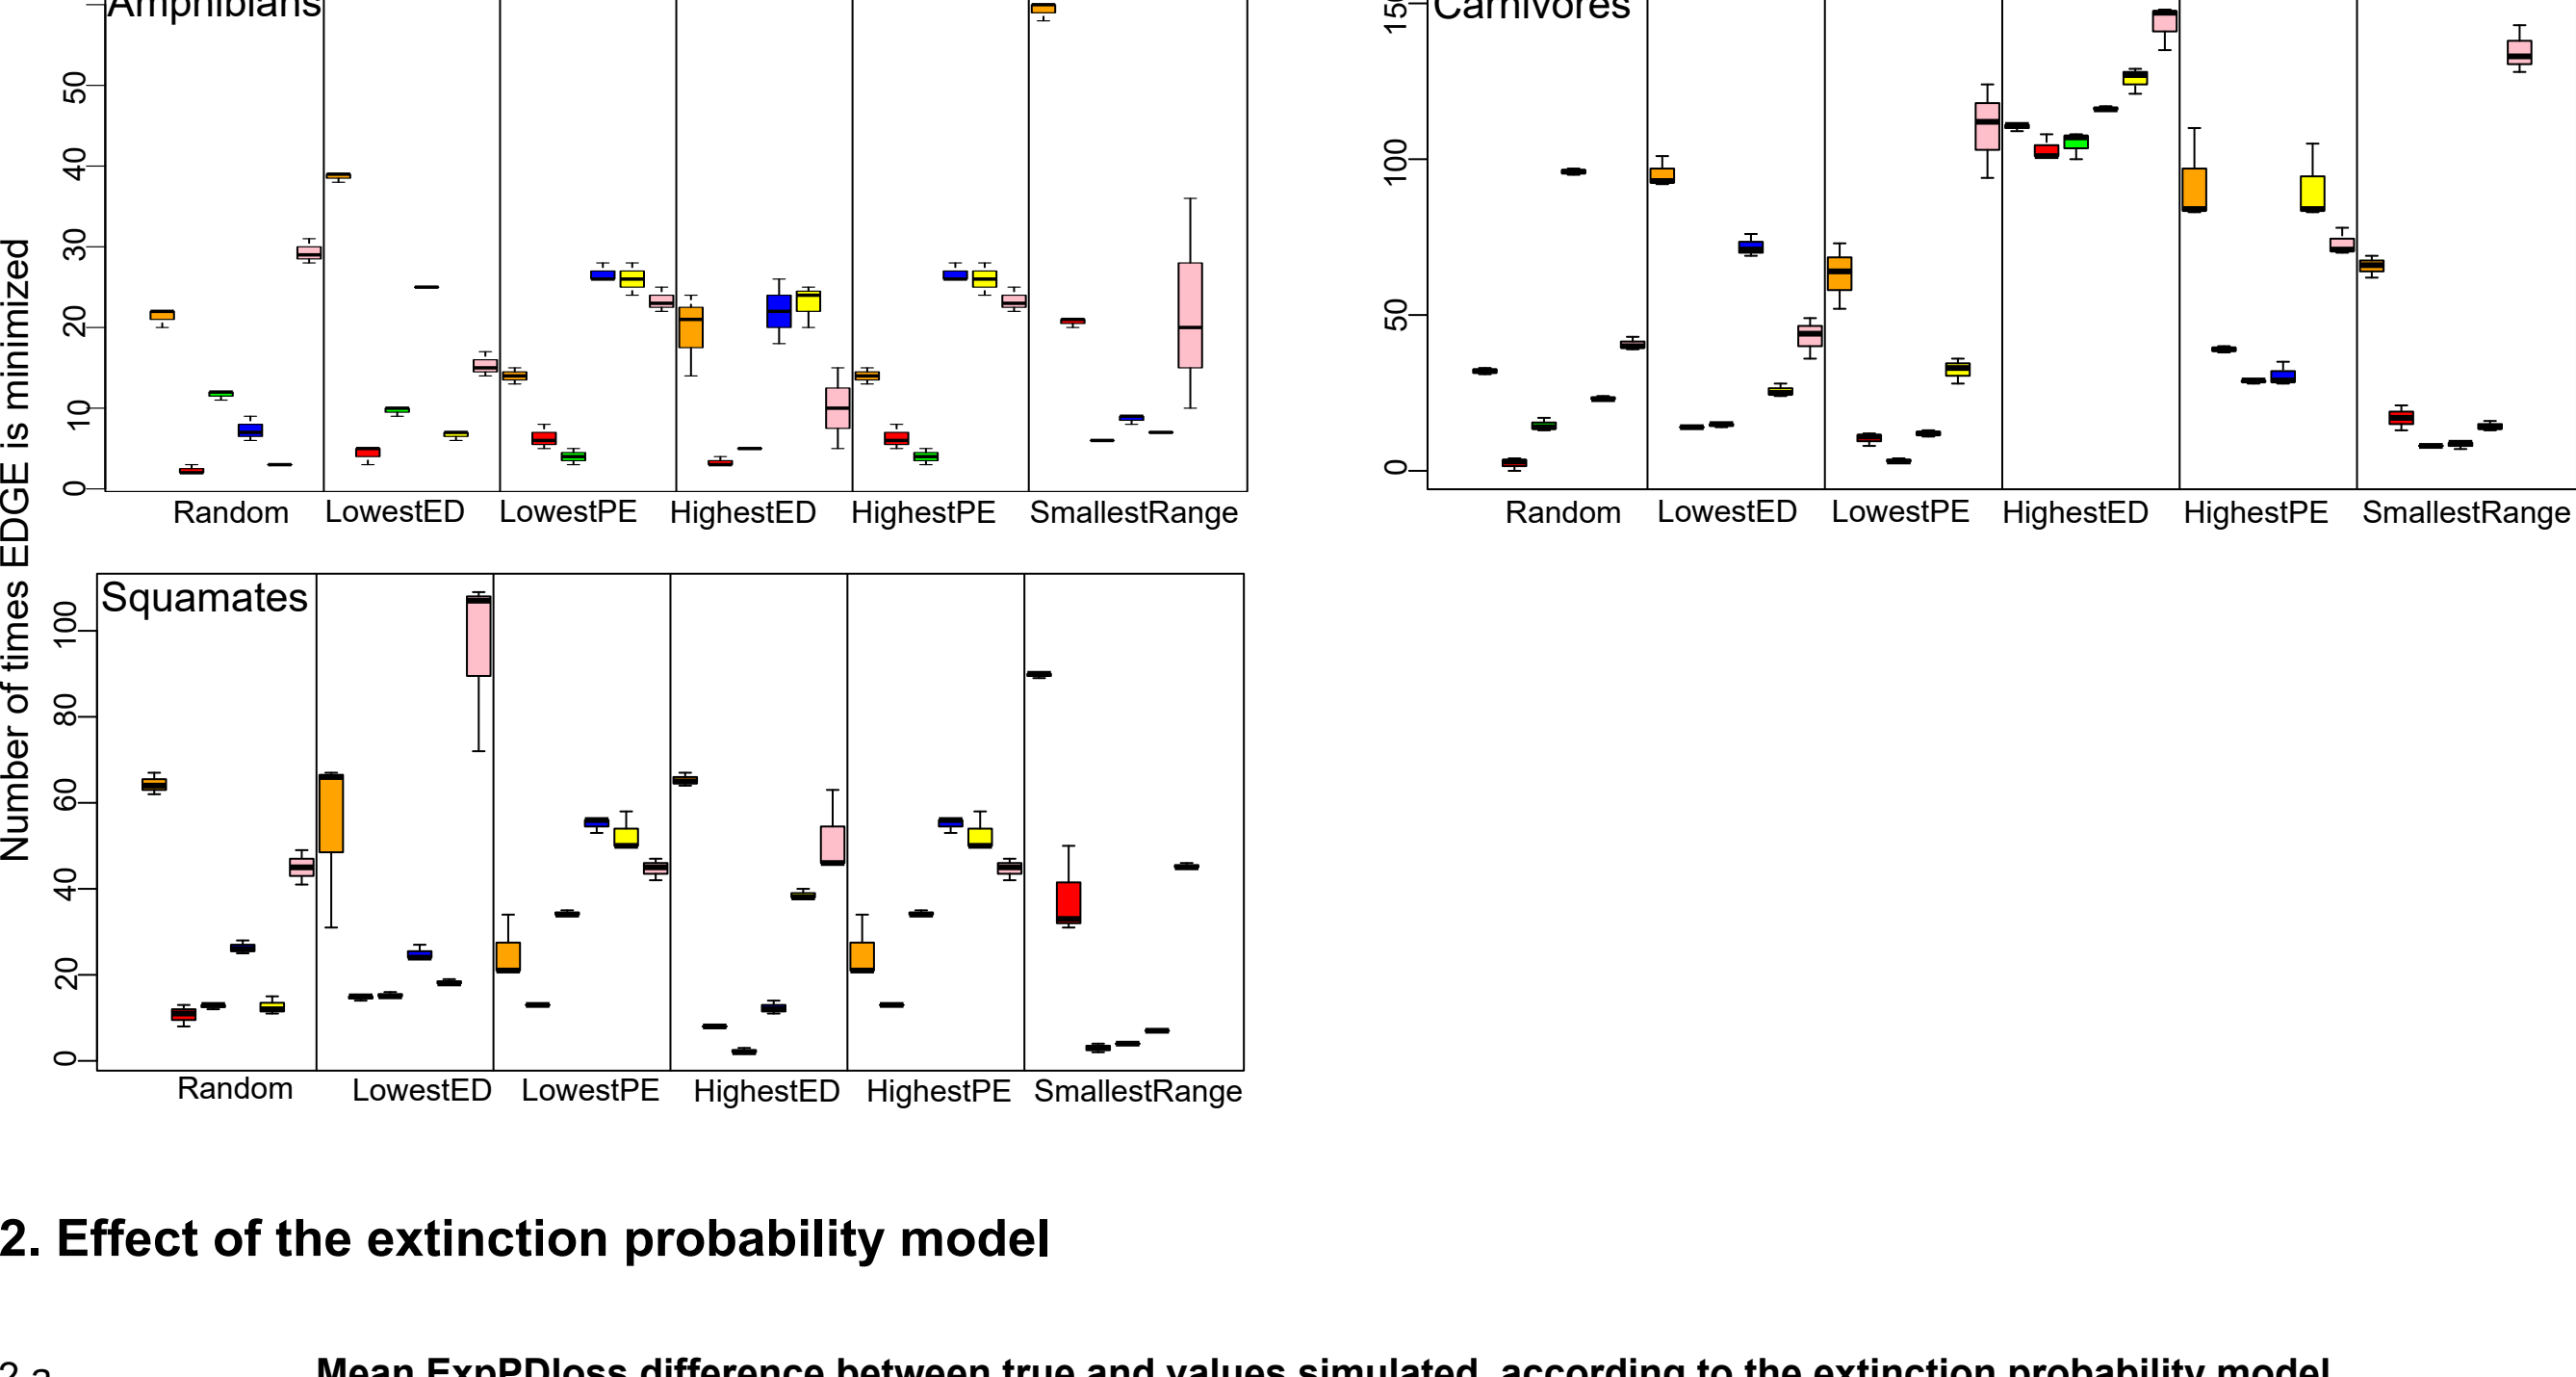

## 2. Effect of the extinction probability model

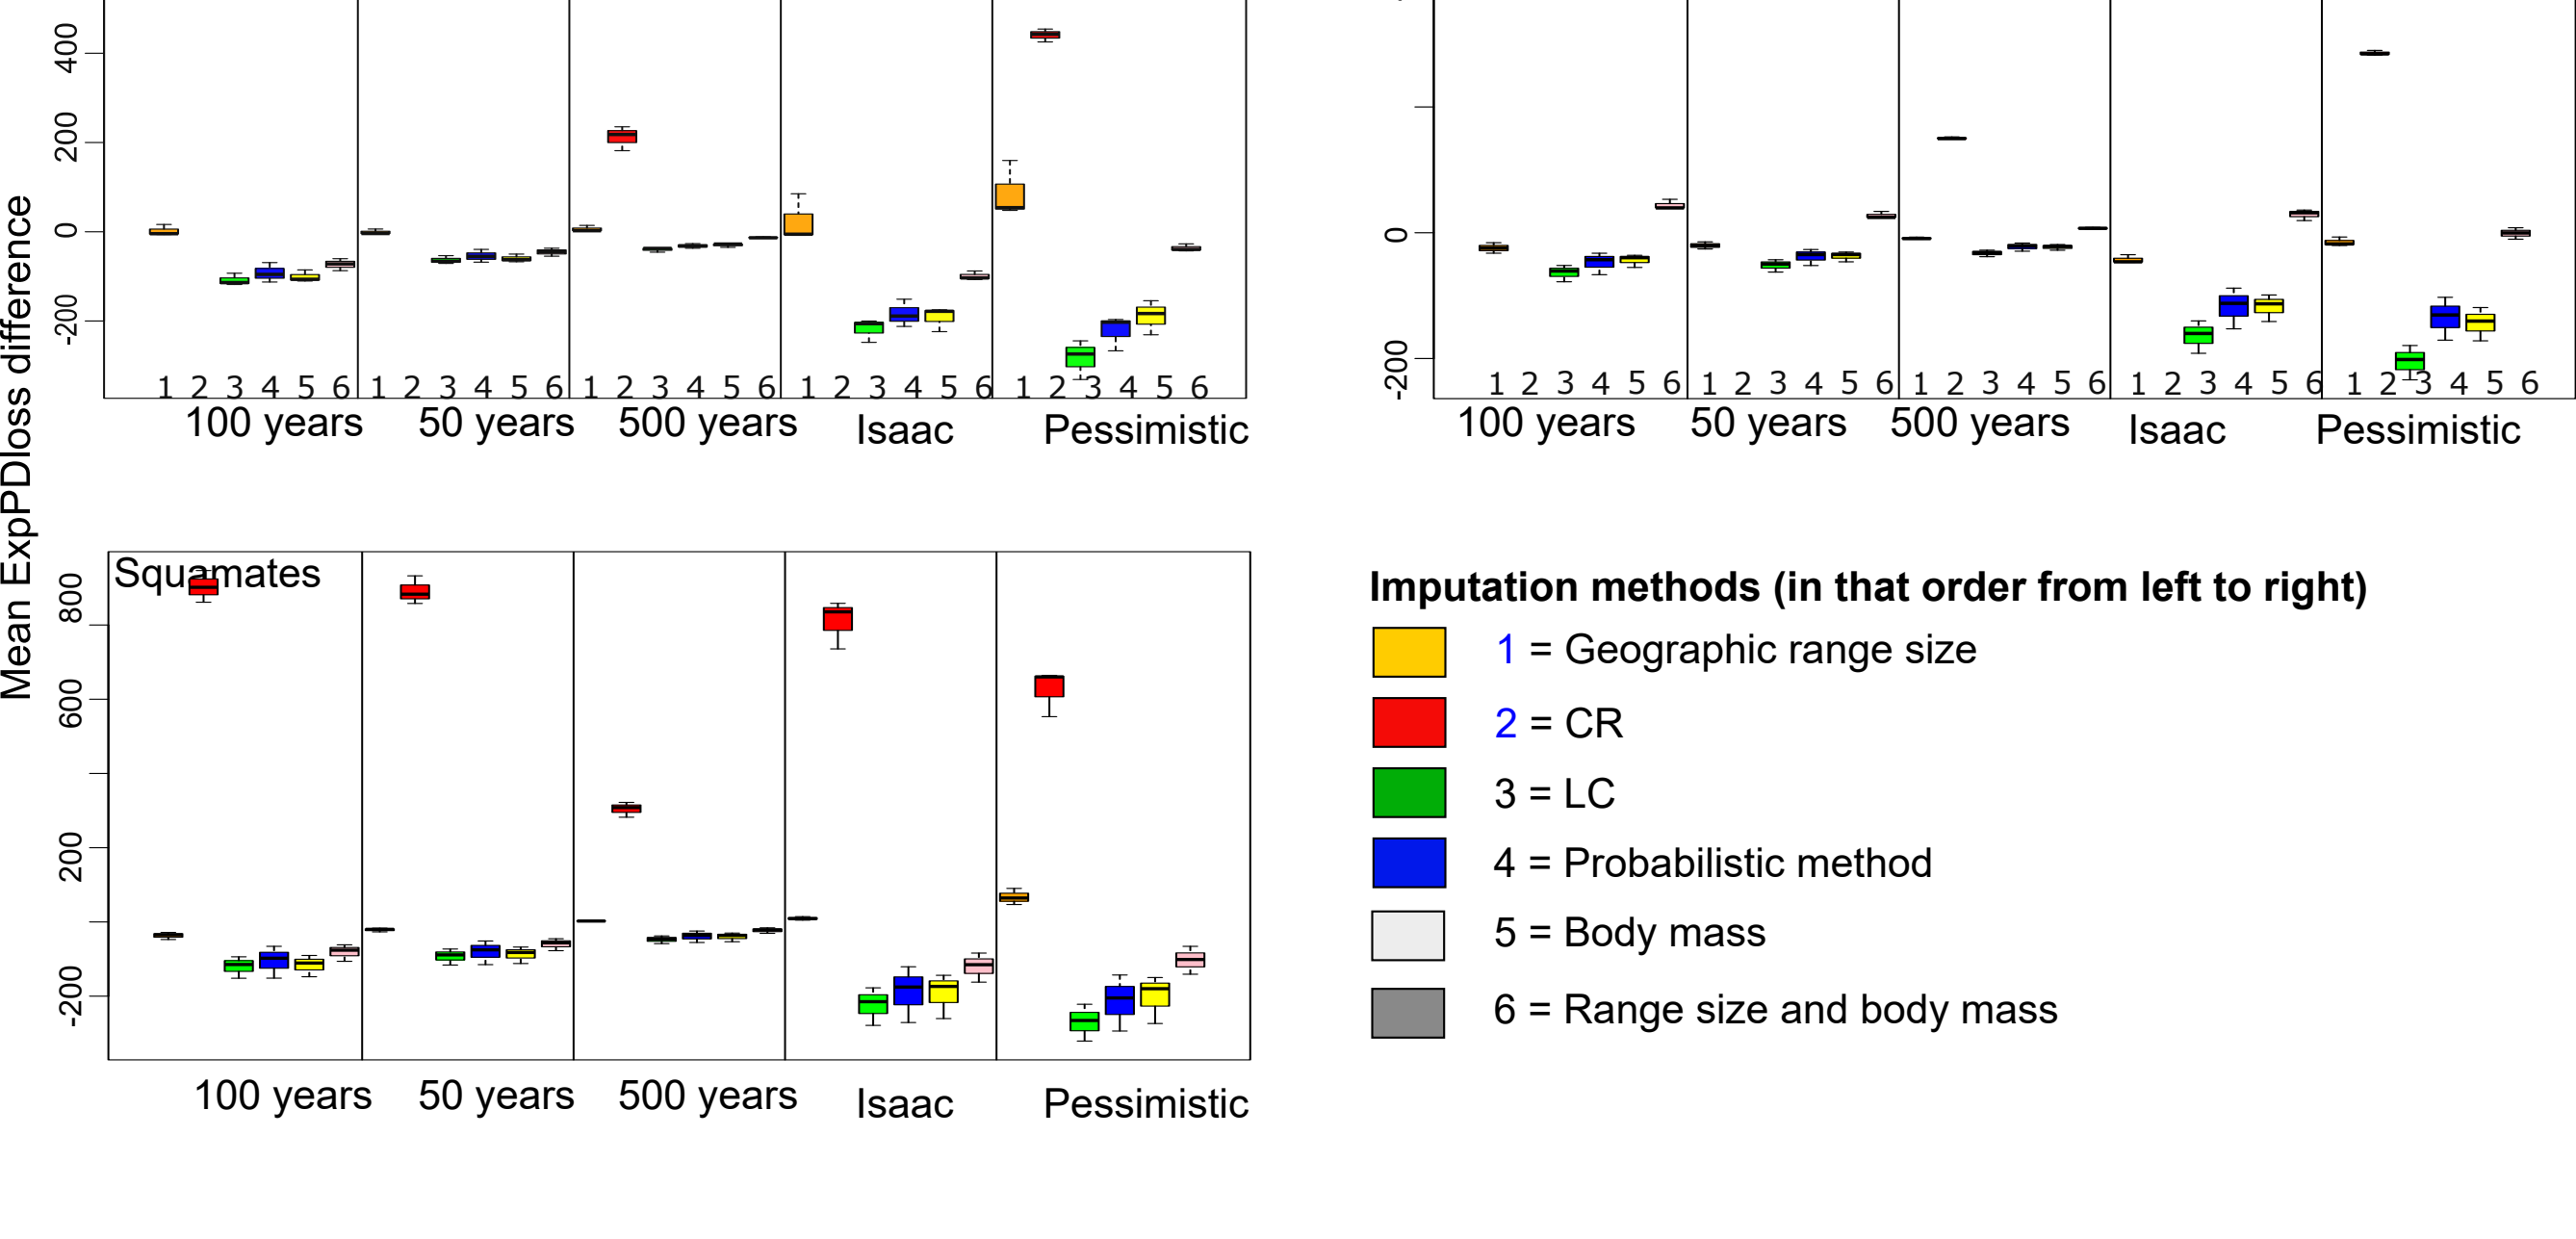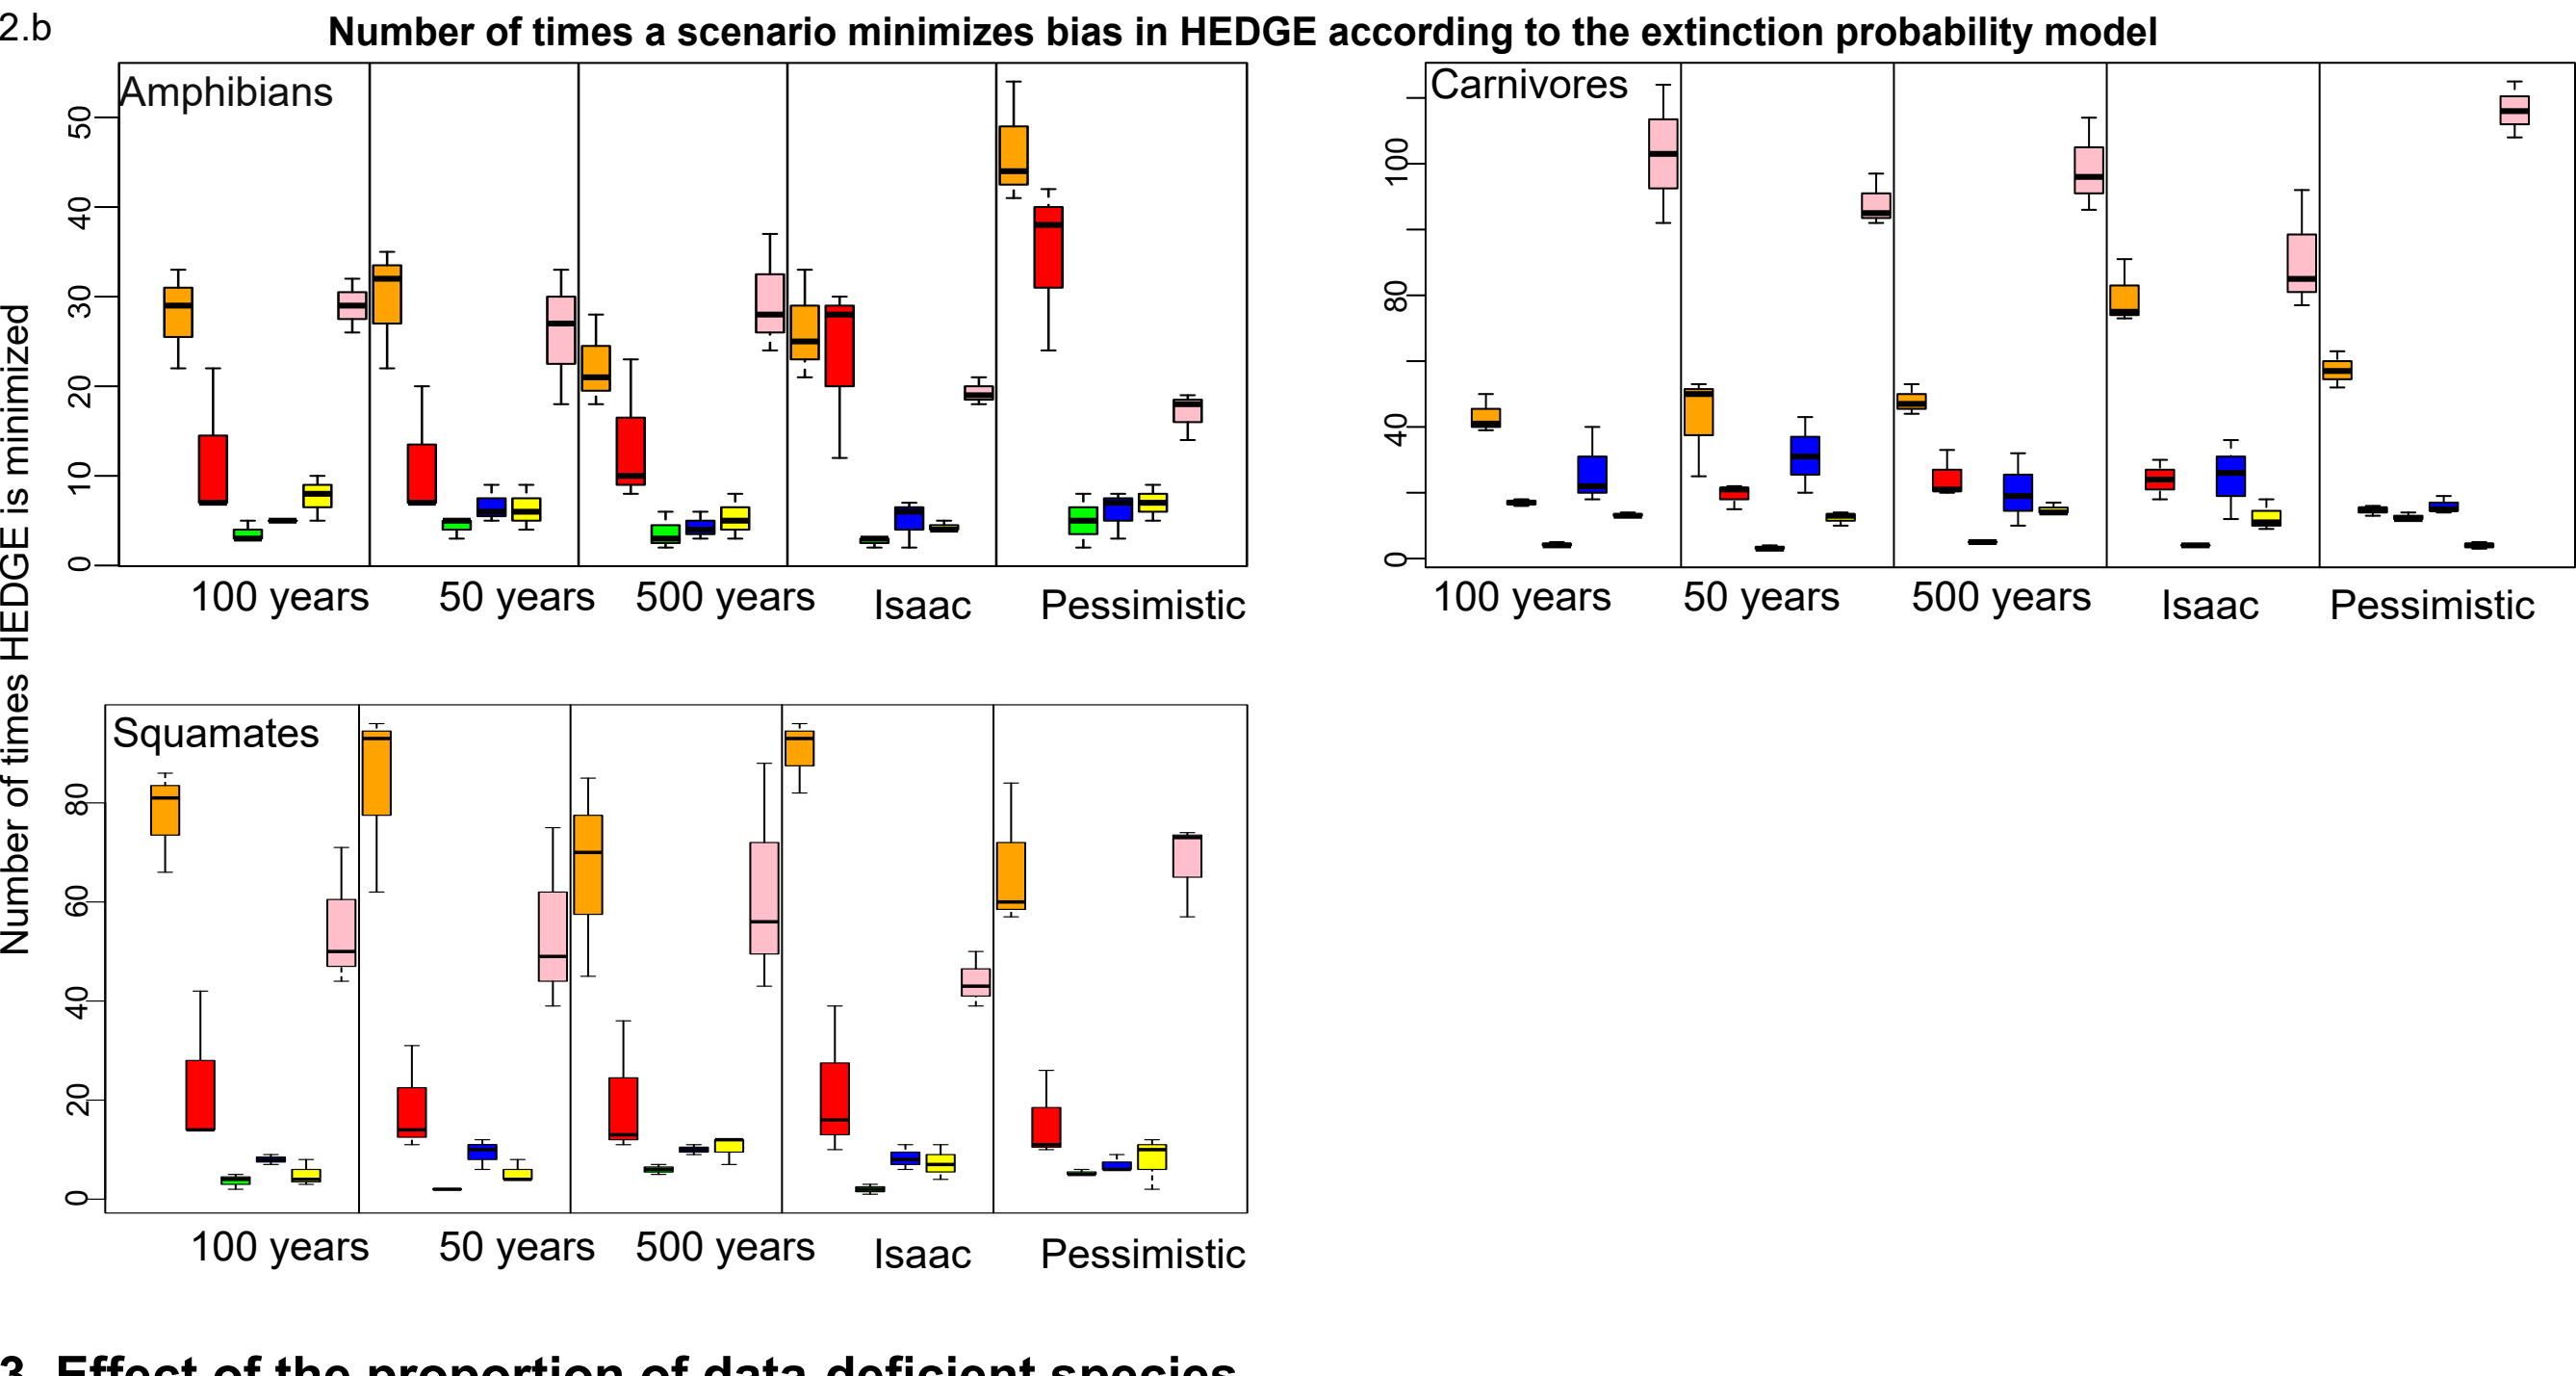

## 3. Effect of the proportion of data-deficient species

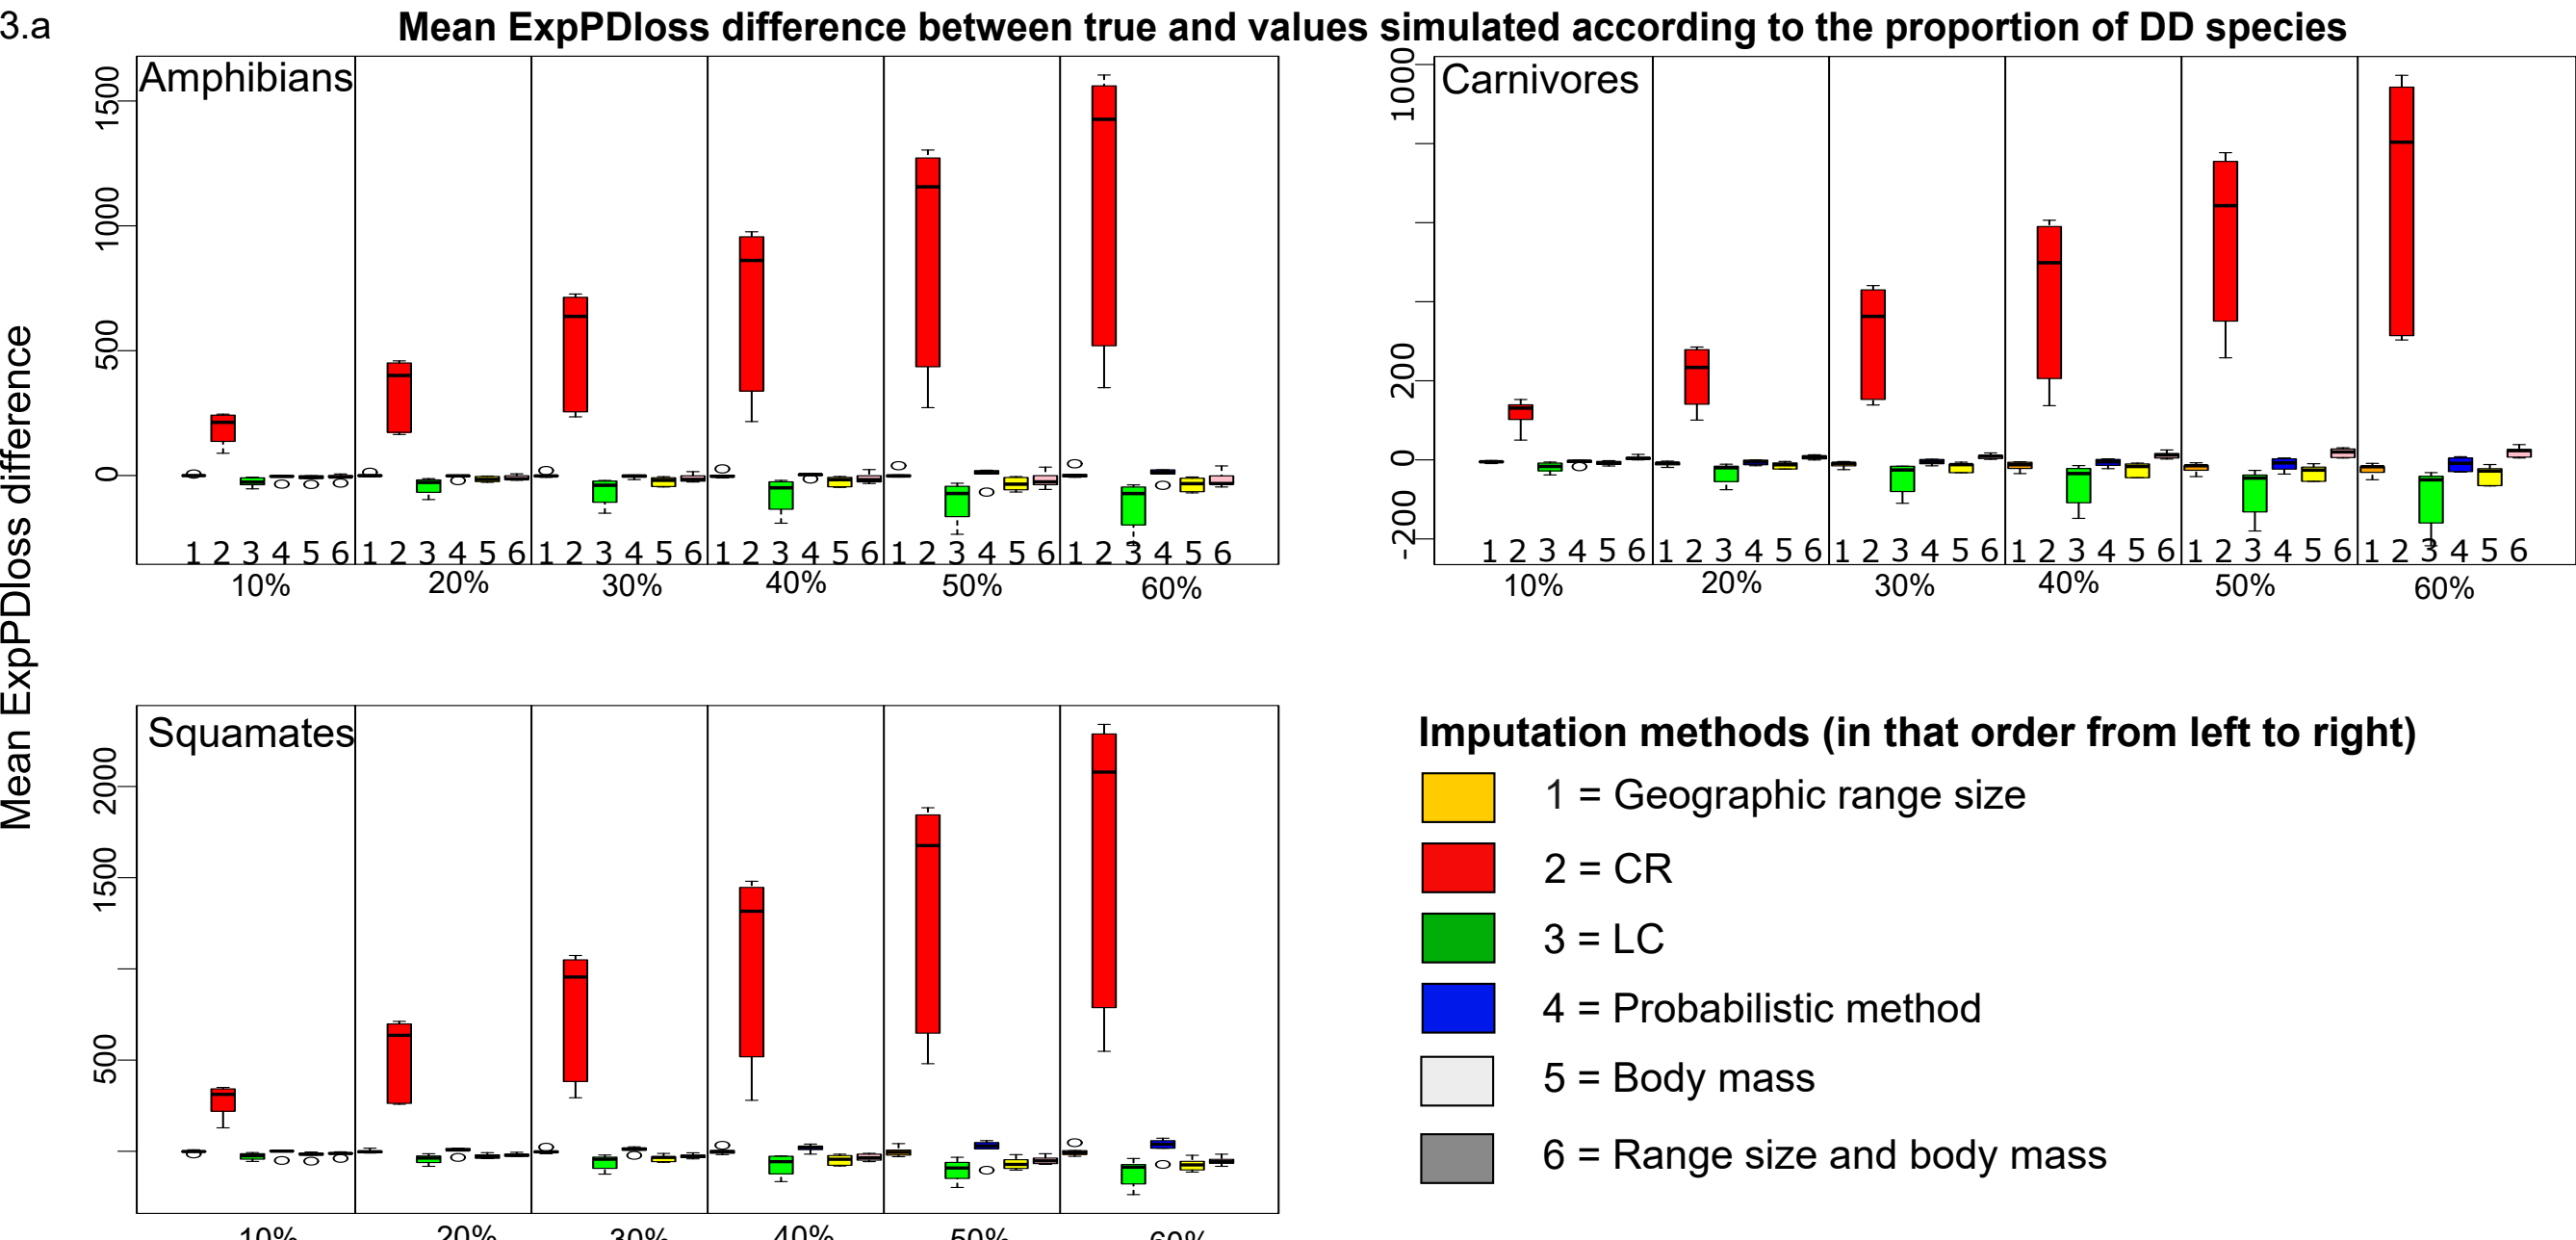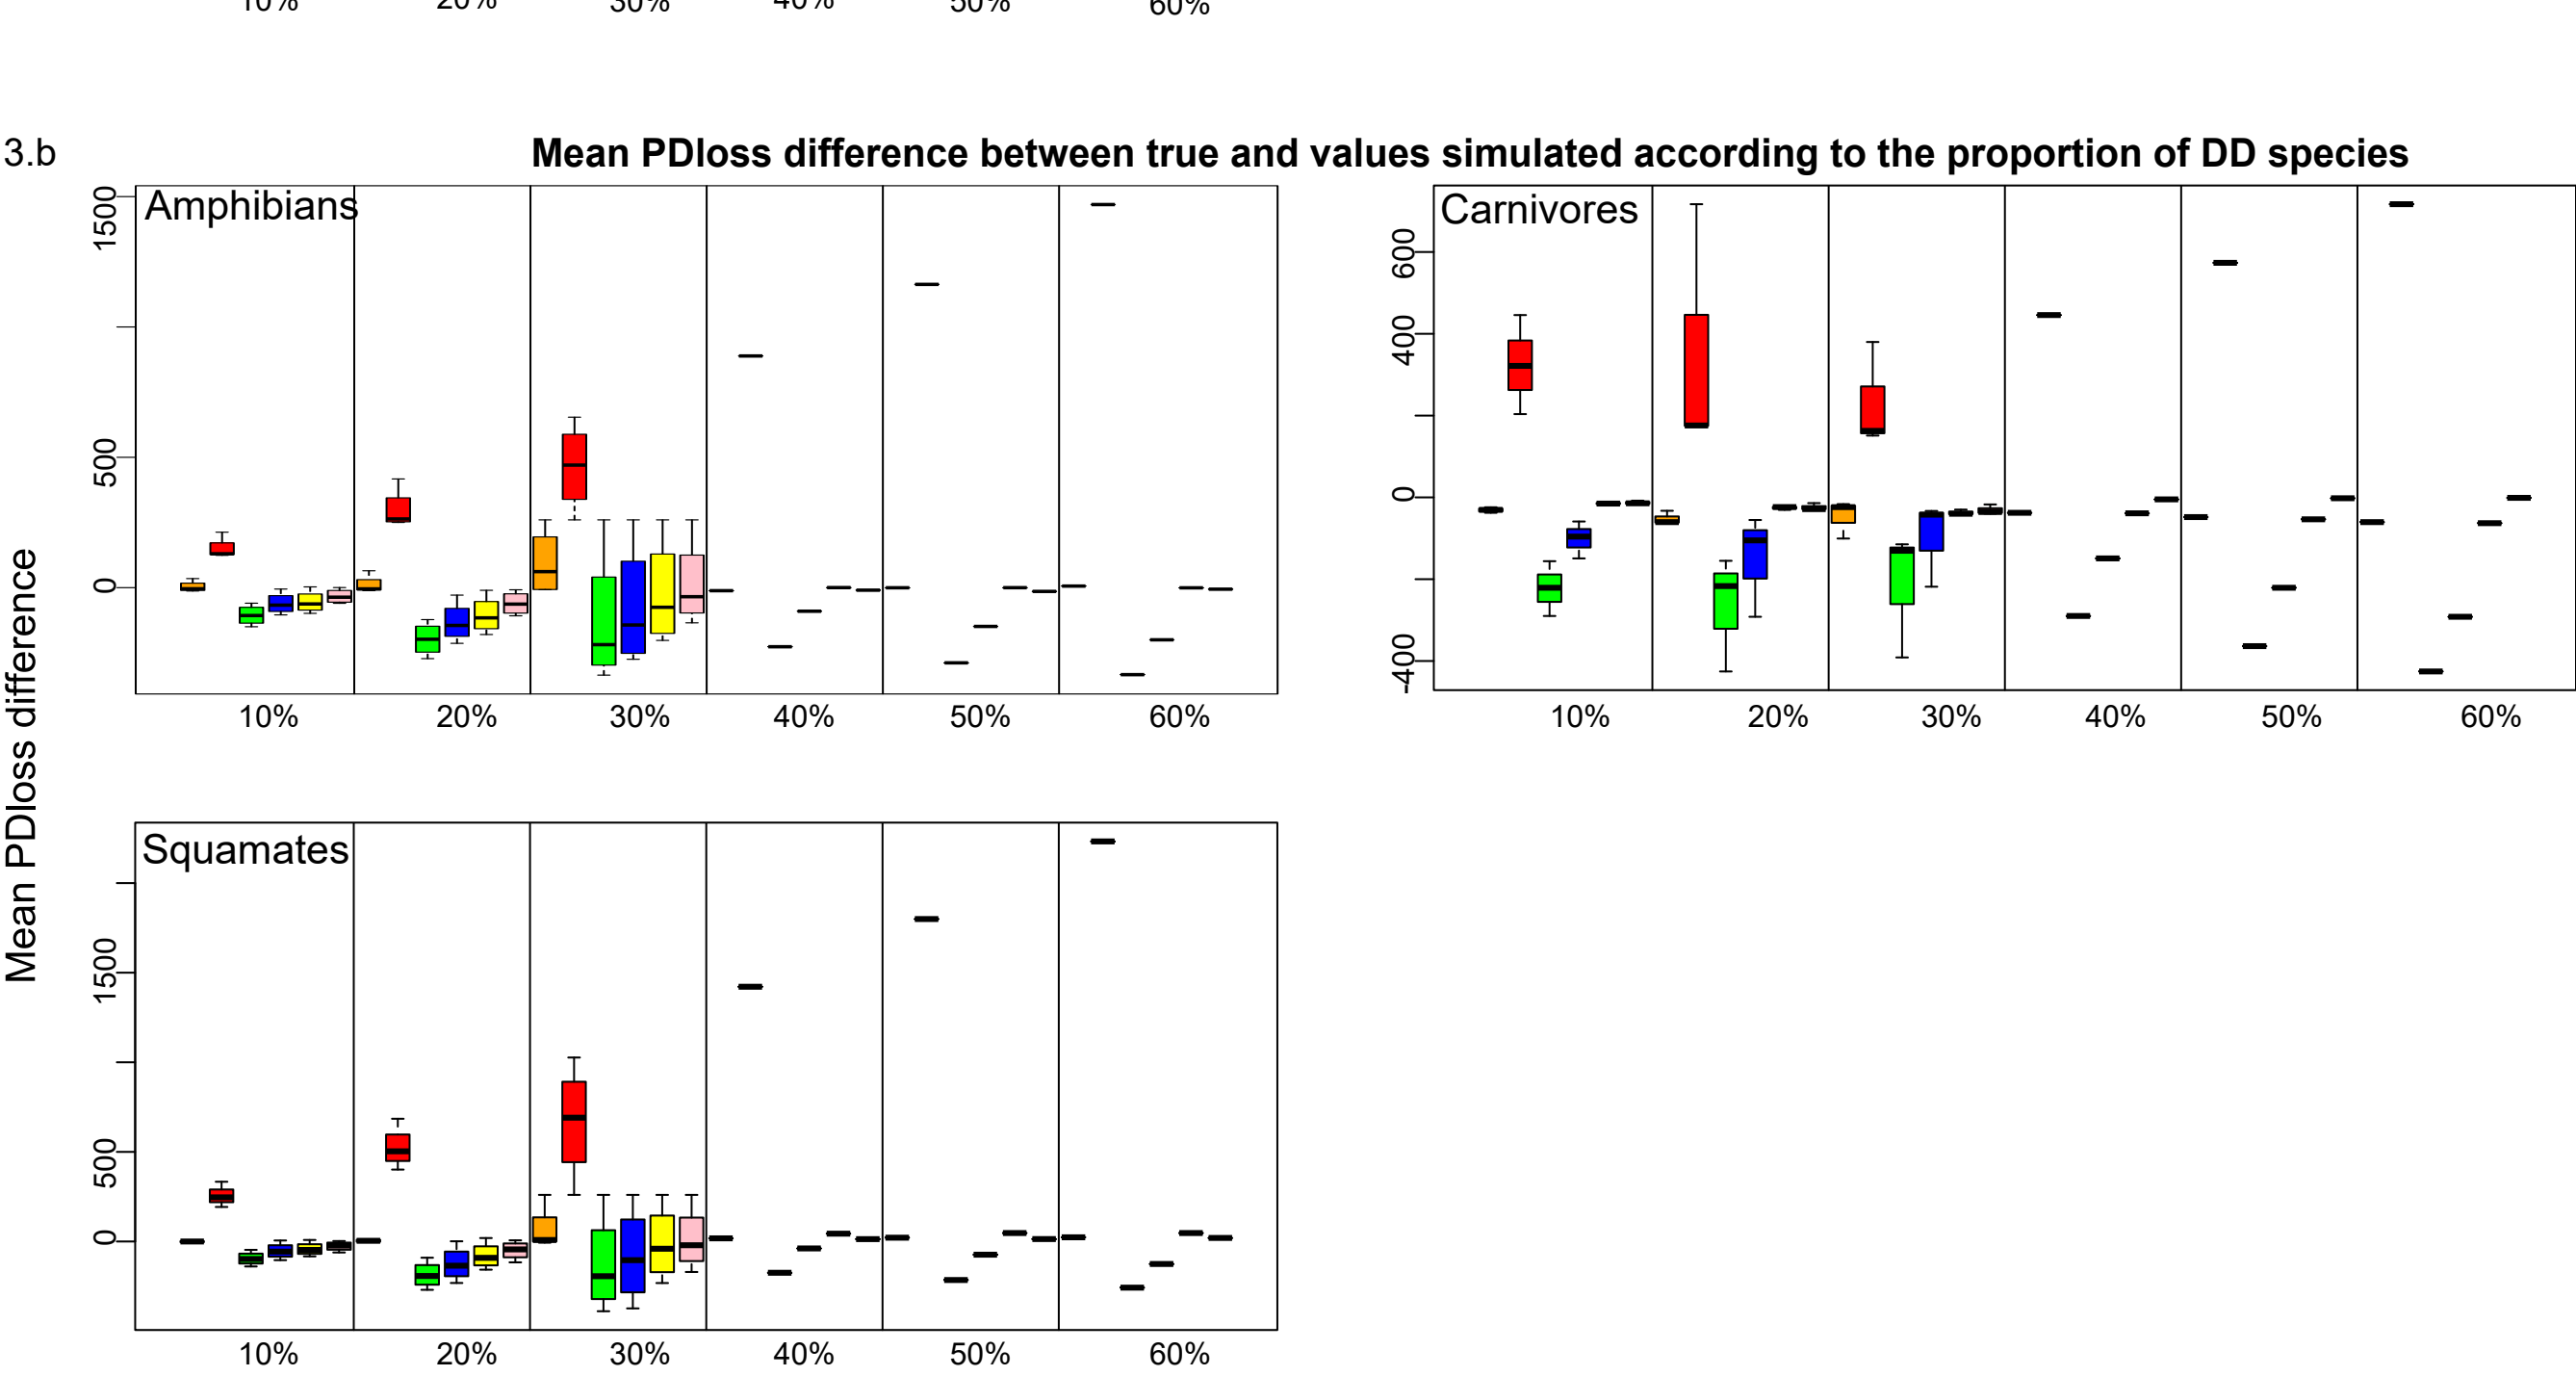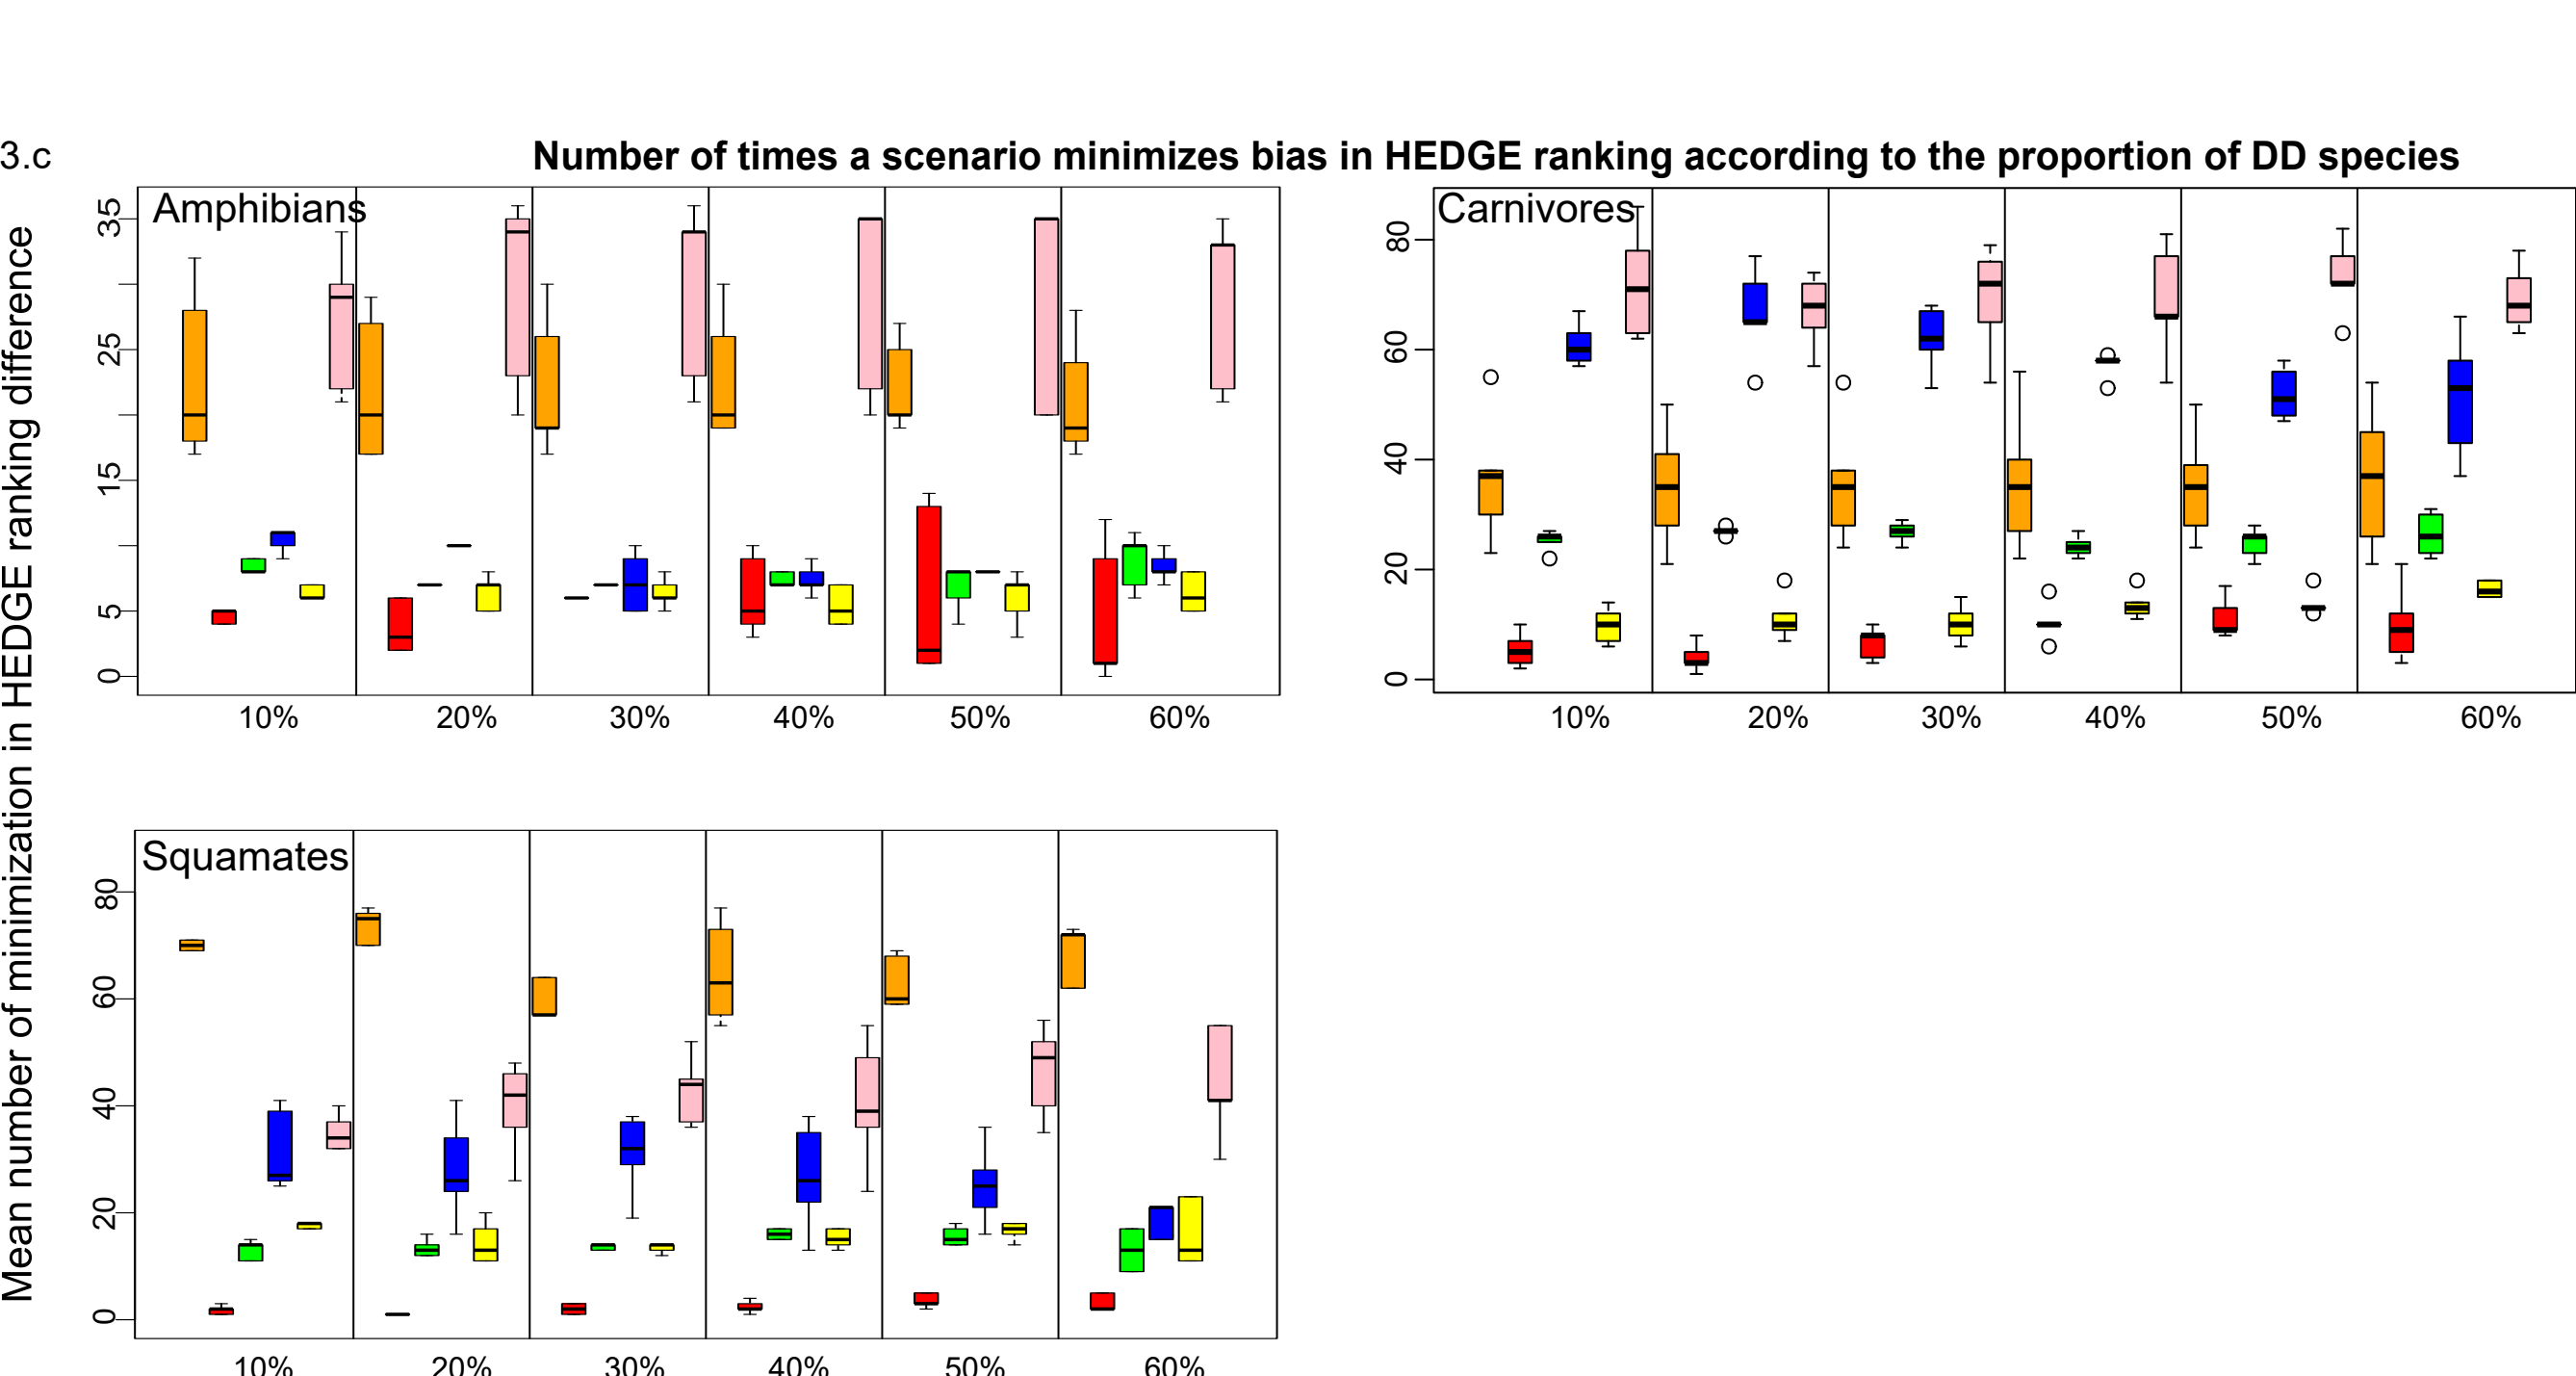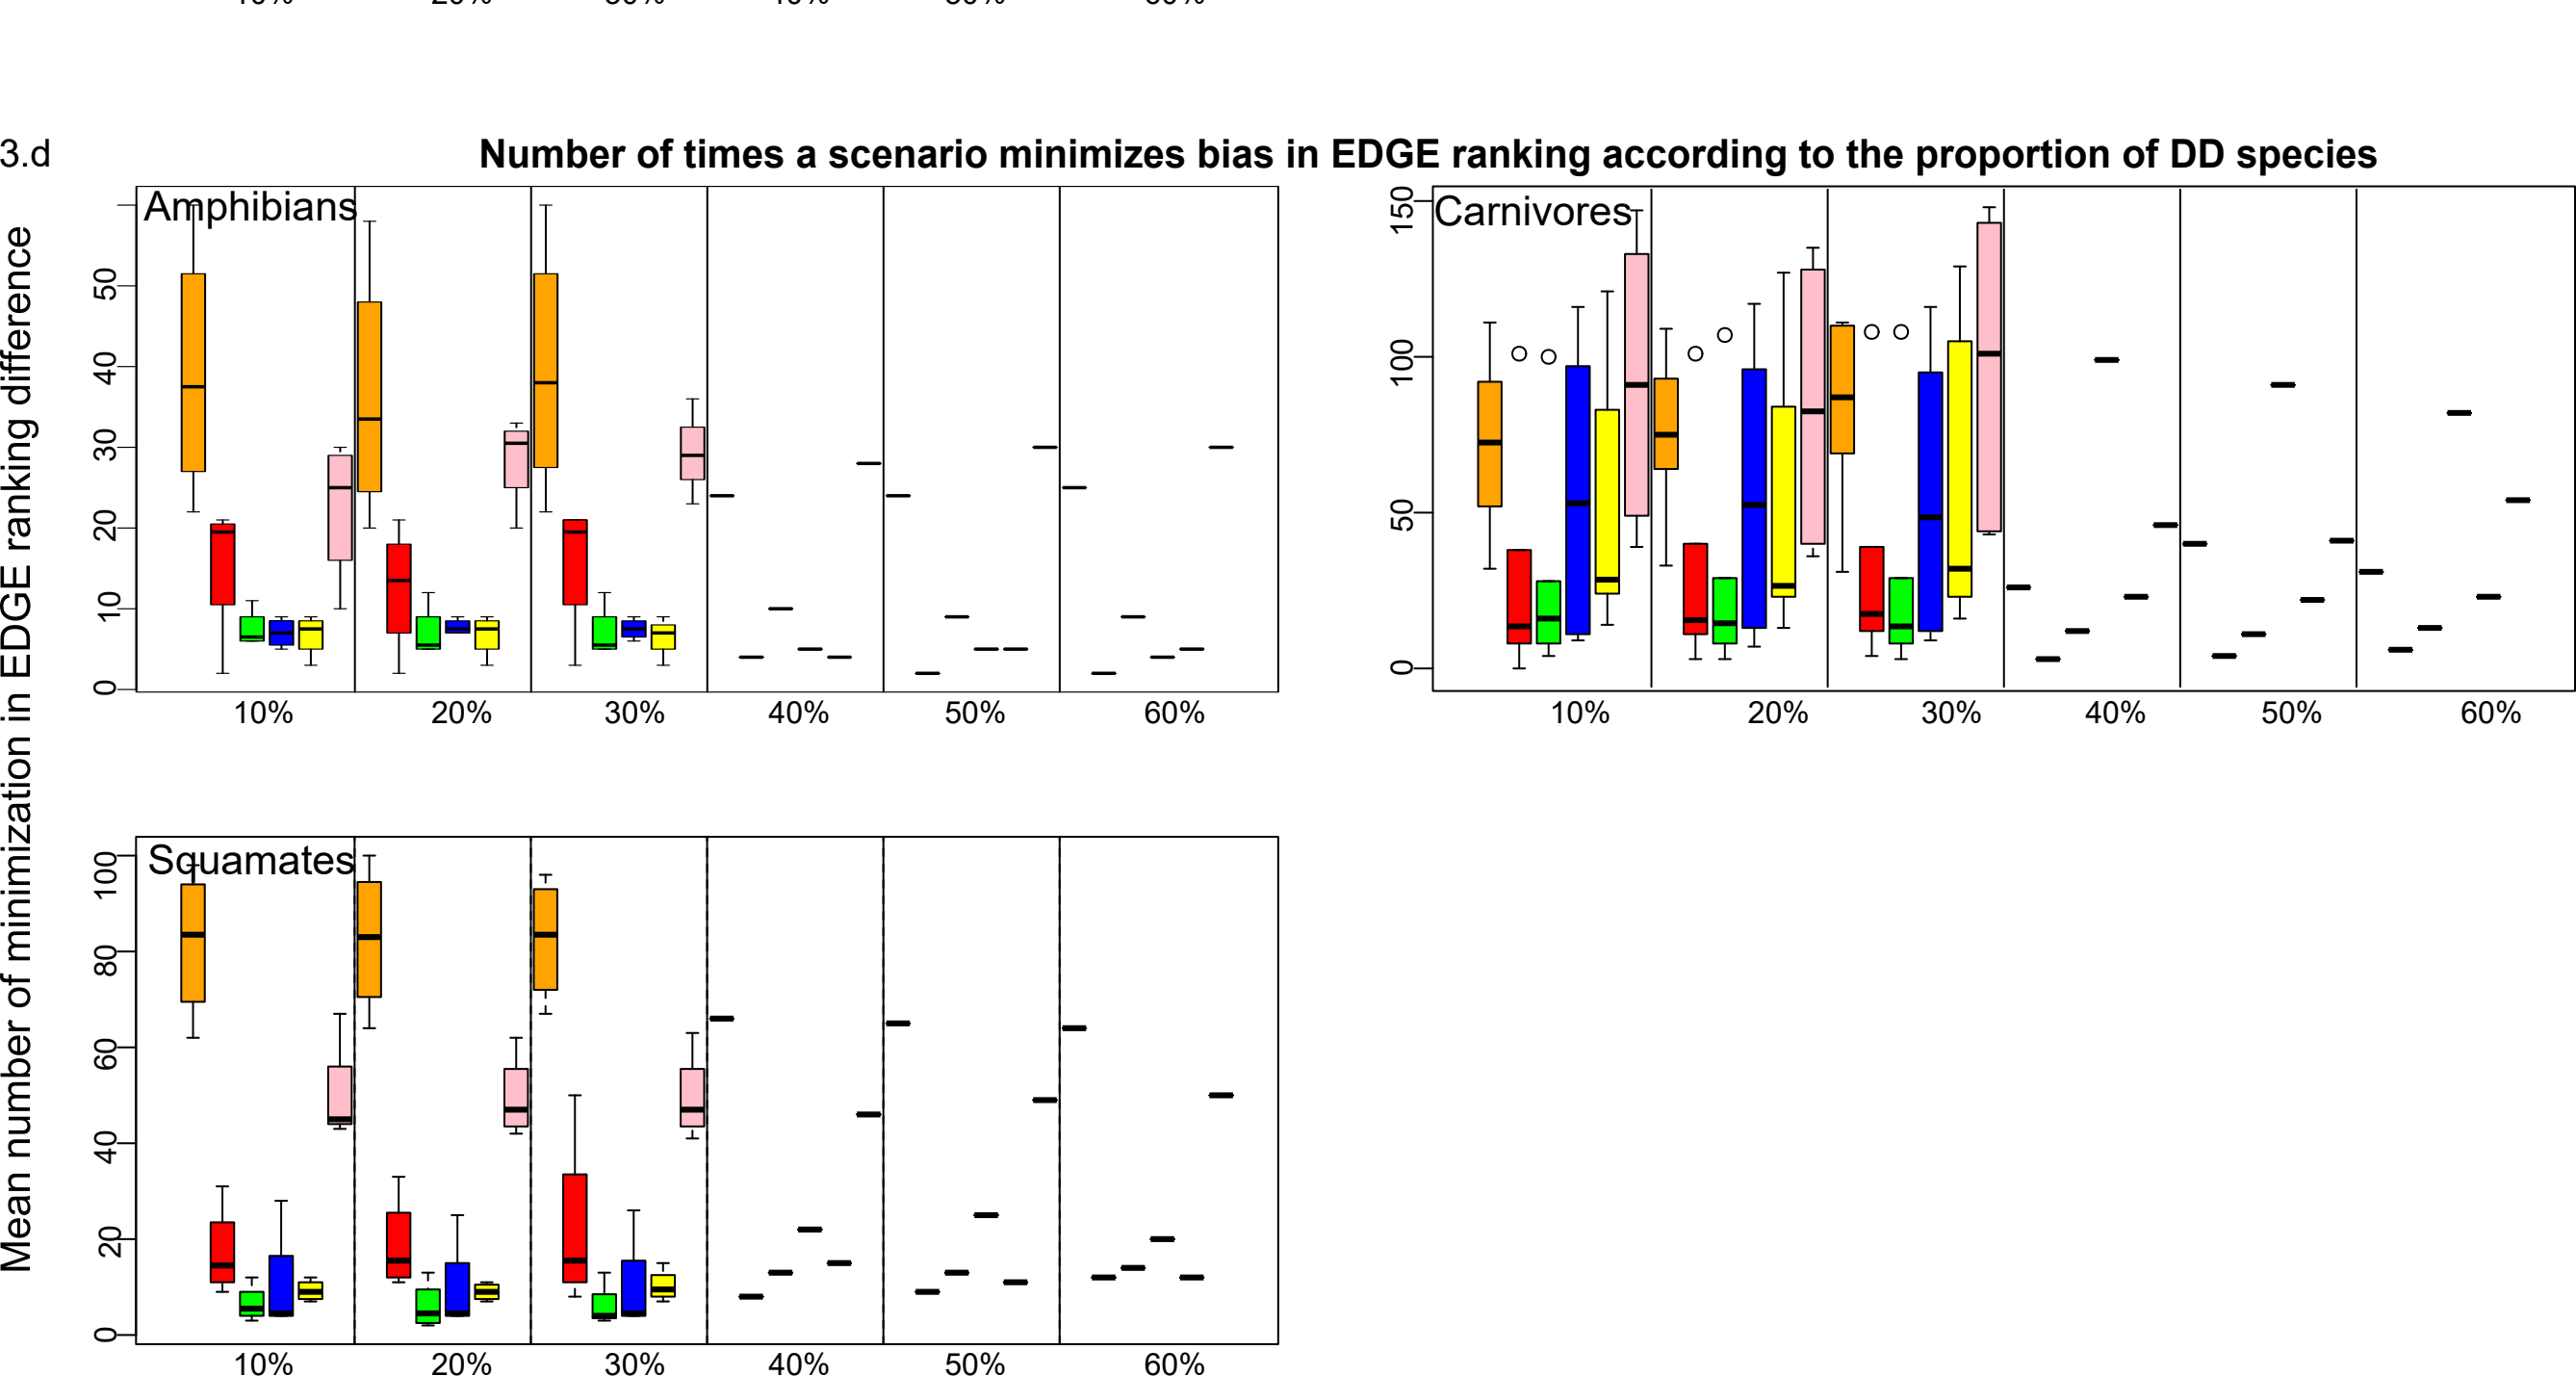

Supplement: ECE3-6-8502-s006.pdf [file ECE3-6-8502-s006.pdf]
